# Supplementary material for: Quercetin Attenuates Pancreatic and Renal D-Galactose-Induced Aging-Related Oxidative Alterations in Rats
Source: PubMed Central journal article supplement (PMC7352460; doi:10.3390/ijms21124348), 2020-06-18
Supplement: ijms-21-04348-s001.pdf [file ijms-21-04348-s001.pdf]

## Supplementary

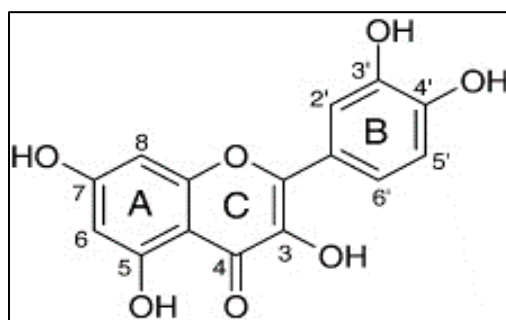

**Figure S1.** Chemical structure of quercetin.

**Table S1.** Ingredients of basal diet.

| Ingredients | g/kg diet |
|-------------|-----------|
| Corn flour  | 529.5     |
| Casein      | 200       |
| Sucrose     | 100       |
| Soybean oil | 70        |
| Cellulose   | 50        |
| Mineral mix | 35        |
| Vitamin mix | 10        |
| L-cystine   | 3         |
| Choline     | 2.5       |

**Table S2.** Antibodies, sources, working dilutions, and conditions for antigen retrieval (10 mM citrate buffer at pH 6.0).

| Antibody                         | Source                                                | Dilution | Heating Condition for 20 min |
|----------------------------------|-------------------------------------------------------|----------|------------------------------|
| Rabbit polyclonal anti-Caspase-3 | 9662, Cell Signaling Technology, Danvers, MA, USA     | 1:300    | 105 °C                       |
| Rabbit polyclonal anti-Bcl2      | SC-492, Santa Cruz Biotechnology, Santa Cruz, CA, USA | 1:300    | 90 °C                        |
| Rabbit polyclonal anti-Ki67      | GTX20833, GeneTex Co., Alton Pkwy Irvine, CA, USA     | 1:150    | 105 °C                       |
| Rabbit polyclonal anti-podocin   | 29040, IBL, Gunma, Japan                              | 1:800    | 105 °C                       |
| Rabbit polyclonal anti-insulin   | ab63820, Abcam, Cambridge, UK                         | 1:500    | 105 °C                       |
| Rabbit polyclonal anti-glucagon  | ab137817, Abcam                                       | 1:500    | 105 °C                       |

**Table S3.** Primers' sequences for RT-PCR.

| Genes         | Genes Forward (5'-3') | Reverse (5'-3')         | Accession No./References |
|---------------|-----------------------|-------------------------|--------------------------|
| <i>Bax</i>    | GCGAATTGGCGATGAACTG   | ATGGTTCTGATCAGCTCGGG    | NM_017059/[57]           |
| <i>Bcl2</i>   | GATTGTGGCCTTCTTTGAGT  | ATAGTTCCACAAAGGCATCC    | NM_016993/[58]           |
| <i>CASP-3</i> | TTTGCGCCATGCTGAAACT   | ACGAGTGAGGATGTGCATGAATT | NM_012922.2              |
| <i>GCLC</i>   | CCACTGTCCAAGGTGACG    | CTTGCTACACCCATCCACCA    | NM_012815                |
| <i>GCLM</i>   | TCAAGCTCACAACCTCA     | CAAACCACCACATTACGCC     | NM_017305                |

|                                |                       |                        |                  |
|--------------------------------|-----------------------|------------------------|------------------|
| <i>IL-1<math>\beta</math></i>  | CACCTCTCAAGCAGAGCACAG | GGGTTCATGGTGAAGTCAAC   | NM_031512.2/[59] |
| <i>IL-6</i>                    | CCACCAGGAACGAAAGTCAAC | TTGCGGAGAGAACTTCATAGCT | NM_012589.2      |
| <i>IL-8</i>                    | TGACCATGAGACACTGTGGC  | GAAGAGCACGGGTCCTTTGA   | [60]             |
| <i>NF-<math>\kappa</math>B</i> | TCTCAGCTGCGACCCCG     | TGGGCTGCTCAATGATCTCC   | AF079314         |
| <i>p21</i>                     | GTGAGACACCAGAGTGCAAGA | ACAGCGATATCGAGACACTCA  | [61]             |
| <i>p53</i>                     | CACAGTCGGATATGAGCATC  | GTCGTCCAGATACTCAGCAT   |                  |
| <i>SOD1</i>                    | CATTCCATCATTGGCCGTA   | CCACCTTTGCCCAAGTCATC   | BC082800.1       |
| <i>TNF-<math>\alpha</math></i> | CAGCCGATTTGCCATTCA    | AGGGCTCTTGATGGCAGAGA   | L19123.1         |
| <i>GAPDH</i><br>(Housekeeping) | TCAAGAAGGTGGTGAAGCAG  | AGGTGGAAGAATGGGAGTTG   | NM_017008.4/[62] |

*Bax*, Bcl-2-associated X protein; *Bcl-2*, B-cell lymphoma 2; *CASP-3*, caspase-3; *GCLC*, glutamate-cysteine ligase catalytic subunit; *GCLM*, glutamate-cysteine ligase regulatory subunit; *IL-1 $\beta$* , interleukin-1beta; *IL-6*, interleukin-6; *IL-8*, interleukin-8; *NF- $\kappa$ B*, Nuclear factor-kappa B; *SOD1*, Cu, Zn-superoxide dismutase; *TNF- $\alpha$* , tumor necrosis factor-alpha; and *GAPDH*, glyceraldehyde 3-phosphate dehydrogenase.
